# Supplementary material
Source: PubMed Central journal article supplement (PMC299749)

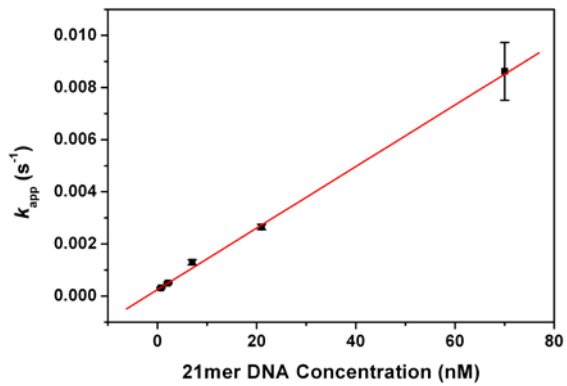

Supplement: pnas_100_25_14629__10.pdf [file pnas_100_25_14629__10.pdf]
